# Supplementary material
Source: Research Square preprint supplement (doi:10.21203/rs.3.rs-9131432/v1)
Supplement: Supplementary file 1 [file 6a2678518549f35f4f5c1688.pdf]

Essential oil chemotype diversity and environmental stability in Turkish basil (*Ocimum basilicum* L.) germplasm: a three-layer field evaluation across contrasting ecologies

Adem Zorlu<sup>1</sup>, İsa Telci<sup>2\*</sup>, Mahfuz Elmastaş<sup>1</sup>, Oya Kaçar<sup>3</sup>, Zehra Aytaç<sup>4</sup>, Emine Bayram<sup>5</sup>

<sup>1</sup> University of Health Sciences, Istanbul, Türkiye

<sup>2</sup> Isparta University of Applied Sciences, Isparta, Türkiye

<sup>3</sup> Bursa Uludağ University, Bursa, Türkiye

<sup>4</sup> Eskişehir Osmangazi University, Eskişehir, Türkiye

<sup>5</sup> Ege University, İzmir, Türkiye

\*Corresponding author: İsa Telci (isatelci@isparta.edu.tr)

### ONLINE RESOURCE 1

Essential oil chemotype diversity and environmental stability in Turkish basil (*Ocimum basilicum* L.)  
germplasm: a three-layer field evaluation across contrasting ecologies

**Table S1. Analysis of variance (ANOVA) summary for essential oil (EO) yield and dominant compound content across three experimental layers.**

| Source                                    | df  | F    | P     |
|-------------------------------------------|-----|------|-------|
| <i>Layer 1: Ecological (3 loc × 2 yr)</i> |     |      |       |
| Genotype (G)                              | 11  | —    | <0.01 |
| Location (L)                              | 2   | —    | <0.01 |
| Year (Yr)                                 | 1   | —    | <0.01 |
| G × L                                     | 22  | 3.82 | <0.01 |
| G × Yr                                    | 11  | 2.14 | <0.05 |
| L × Yr                                    | 2   | 4.67 | <0.01 |
| G × L × Yr                                | 22  | 1.43 | <0.05 |
| Error                                     | 120 |      |       |

|                                                         |    |       |       |
|---------------------------------------------------------|----|-------|-------|
| <b>Layer 2: Ontogenetic (3 stage<br/>× 2 yr, Bursa)</b> |    |       |       |
| Stage                                                   | 2  | 18.44 | <0.01 |
| G × Stage                                               | 22 | 2.91  | <0.01 |
| Year                                                    | 1  | 6.23  | <0.05 |
| Error                                                   | 66 |       |       |
| <b>Layer 3: Seasonal (2 season<br/>× 2 yr, Tokat)</b>   |    |       |       |
| Season                                                  | 1  | 12.77 | <0.01 |
| Year × Season                                           | 1  | 5.84  | <0.05 |
| G × Season                                              | 11 | 1.98  | <0.05 |
| Error                                                   | 44 |       |       |

*Response variable: EO yield (mL·100 g<sup>-1</sup> DW). All effects tested at  $\alpha = 0.01$  unless noted. Replication nested within location × year.*

**Table S2. Genotype characteristics and collection origin of the 12 basil accessions used in the present study.**

| <b>Genotype</b> | <b>Origin</b>     | <b>Chemotype</b>          | <b>Key characteristic</b>     | <b>Collection</b> |
|-----------------|-------------------|---------------------------|-------------------------------|-------------------|
| R-1             | Turkish landrace  | Linalool                  | Moderate linalool             | Anatolian         |
| R-3k            | Turkish landrace  | Linalool                  | High linalool                 | Anatolian         |
| R-4             | Turkish landrace  | Linalool                  | Co-accumulates methyl eugenol | Anatolian         |
| R-10A           | Turkish landrace  | Estragole                 | Very high estragole (>860 %)  | Anatolian         |
| R-15            | Turkish landrace  | Linalool                  | High EO yield                 | Anatolian         |
| R-16            | Turkish landrace  | Linalool                  | Highly stable linalool        | Anatolian         |
| R-17            | Turkish landrace  | Citral                    | Geranial + neral dominant     | Anatolian         |
| R-19            | Turkish landrace  | Linalool                  | High $\alpha$ -bergamotene    | Anatolian         |
| R-20            | Turkish landrace  | Linalool                  | Moderately stable linalool    | Anatolian         |
| R-23            | Foreign accession | Methyl cinnamate/linalool | Dual dominant compounds       | C/E European      |
| Y-7             | Foreign accession | Linalool                  | High eugenol secondary        | C/E European      |
| Y-15            | Foreign accession | Linalool                  | Standard linalool type        | C/E European      |

*All accessions are deposited in the germplasm collection of the Department of Field Crops, Tokat Gaziosmanpaşa University.*

*Accession codes follow the original collection numbering system.*

**Table S3. Climatic characteristics of the three trial locations during the experimental growing seasons.**

| Parameter             | Bursa Y1  | Bursa Y2 | Eskişehir Y1 | Eskişehir Y2 | Tokat Y1   | Tokat Y2 |
|-----------------------|-----------|----------|--------------|--------------|------------|----------|
| Latitude              | 40°13'N   |          | 39°45'N      |              | 40°19'N    |          |
| Longitude             | 28°51'E   |          | 30°33'E      |              | 36°27'E    |          |
| Altitude (m a.s.l.)   | 120       |          | 789          |              | 594        |          |
| Soil type             | Clay-loam |          | Silty-clay   |              | Sandy-loam |          |
| GS mean temp. (°C)    | 21.5      | 21.5     | 18.1         | 18.1         | 18.5       | 20.9     |
| GS total precip. (mm) | 197.6     | 425.4    | 130.1        | 257.9        | 156.2      | 186.8    |
| GS mean RH (%)        | 61.0      | 71.9     | 55.2         | 66.9         | 54.8       | 49.5     |
| Annual mean T (°C)    | 15.6      | 16.0     | 11.9         | 12.1         | 12.8       | 14.6     |
| Annual precip. (mm)   | 591.8     | 846.6    | 283.1        | 451.2        | 366.5      | 384.2    |
| Annual mean RH (%)    | 66.1      | 73.9     | 62.3         | 71.1         | 58.6       | 54.0     |
| 30-yr normal T (°C)   | 14.5      |          | 10.8         |              | 12.5       |          |
| 30-yr normal P (mm)   | 707       |          | 388          |              | 441        |          |

GS = growing season (May–September). Y1 = Year 1; Y2 = Year 2. RH = relative humidity. T = temperature. P = precipitation. 30-yr normals from Turkish State Meteorological Service (MGM). 30-year normals refer to the 1981–2010 reference period. Monthly data available from corresponding author upon request. Planting: late May at all locations. Harvest (onset of flowering): Bursa late Jun–early Jul; Eskişehir mid-Jul; Tokat early–mid Jul.

**Table S4. Retention indices (RI) of major essential oil compounds identified by GC-MS on BPX5 column.**

| Compound                    | RI calc. | RI lit. | ID method   | Chemotype(s)       |
|-----------------------------|----------|---------|-------------|--------------------|
| $\alpha$ -Pinene            | 932      | 932     | RI, MS      | Minor (all)        |
| $\beta$ -Pinene             | 974      | 974     | RI, MS      | Minor (all)        |
| Myrcene                     | 988      | 988     | RI, MS      | Minor (all)        |
| Limonene                    | 1024     | 1024    | RI, MS      | Minor (all)        |
| Eucalyptol (1,8-cineole)    | 1026     | 1026    | RI, MS      | Secondary (R-15)   |
| (Z)- $\beta$ -Ocimene       | 1032     | 1032    | RI, MS      | Minor (R-15)       |
| $\gamma$ -Terpinene         | 1054     | 1054    | RI, MS      | Minor (all)        |
| Linalool                    | 1095     | 1095    | Std, RI, MS | Dominant (9 gen.)  |
| Camphor                     | 1141     | 1141    | RI, MS      | Minor (R-3k)       |
| $\alpha$ -Terpineol         | 1186     | 1186    | Std, RI, MS | Minor (all)        |
| Estragole (methyl chavicol) | 1195     | 1195    | Std, RI, MS | Dominant (R-10A)   |
| Neral (citral b)            | 1235     | 1235    | RI, MS      | Co-dominant (R-17) |
| Geraniol                    | 1249     | 1249    | Std, RI, MS | Minor (R-17)       |
| Geranial (citral a)         | 1264     | 1264    | RI, MS      | Co-dominant (R-17) |
| Eugenol                     | 1356     | 1356    | Std, RI, MS | Secondary (Y-7)    |
| Methyl cinnamate            | 1378     | 1376    | Std, RI, MS | Dominant (R-23)    |
| Methyl eugenol              | 1403     | 1403    | Std, RI, MS | Secondary (R-4)    |
| $\alpha$ -Bergamotene       | 1411     | 1411    | RI, MS      | Secondary (R-19)   |
| $\delta$ -Cadinene          | 1522     | 1522    | RI, MS      | Secondary (R-20)   |

RI calc. = retention index calculated on BPX5 column (30 m  $\times$  0.25 mm i.d.  $\times$  0.25  $\mu$ m) relative to C8–C20 n-alkane series. RI lit. = literature values from Adams RP (2017). ID method: Std = co-injection with authentic reference standard (Sigma-Aldrich,  $\geq$ 0.980 g g<sup>-1</sup> purity); RI = retention index matching; MS = mass spectral matching (WILEY and NIST databases). Compounds present at <0.1% relative peak area not included; this threshold corresponds to approximately 3 $\times$  the mean injection-to-injection variability (RSD <3%), ensuring only reliably quantifiable peaks are reported.
